# Supplementary material for: Mechanistic Understanding Enables the Rational Design of Salicylanilide Combination Therapies for Gram-Negative Infections
Source: PubMed Central journal article supplement (PMC7492738; doi:10.1128/mbio.02068-20), 2020-09-15
Supplement: mBio.02068-20-st001.pdf [file mBio.02068-20-st001.pdf]

**Table S1 | *E. coli* strains utilized in this study**

| <i>E. coli</i> strain   | Relevant characteristics and references                                                                                                                          | Niclosamide MIC ( $\mu\text{g}\cdot\text{mL}^{-1}$ ) |
|-------------------------|------------------------------------------------------------------------------------------------------------------------------------------------------------------|------------------------------------------------------|
| Wild-type BW25113       | $\Delta(\text{araD-araB})567$ , $\Delta\text{lacZ4787}>::\text{rrnB-3}$ , $\lambda^-$ , <i>rph-1</i> , $\Delta(\text{rhaD-rhaB})568$ , <i>hsdR514</i> [16738554] | >32                                                  |
| $\Delta\text{acrA}$     | Deletion of AcrA membrane fusion protein of resistance-nodulation-division family (1)                                                                            | >32                                                  |
| $\Delta\text{acrB}$     | Deletion of AcrB transporter of resistance-nodulation-division family (1)                                                                                        | >32                                                  |
| $\Delta\text{acrZ}$     | Deletion of AcrZ accessory protein of resistance-nodulation-division family (1)                                                                                  | >32                                                  |
| $\Delta\text{emrA}$     | Deletion of EmrA membrane fusion protein of major facilitator superfamily (1)                                                                                    | >32                                                  |
| $\Delta\text{emrB}$     | Deletion of EmrB transporter of major facilitator superfamily (1)                                                                                                | >32                                                  |
| $\Delta\text{macA}$     | Deletion of MacA membrane fusion protein of ATP-binding cassette family (1)                                                                                      | >32                                                  |
| $\Delta\text{macB}$     | Deletion of MacB transporter of ATP-binding cassette family (1)                                                                                                  | >32                                                  |
| $\Delta\text{tolC}$     | Deletion of TolC outer membrane factor, interacts with multiple efflux families (1)                                                                              | 0.5                                                  |
| $\Delta\text{mdtP}$     | Deletion of MdtP outer membrane factor, interacts with multiple efflux families (1)                                                                              | >32                                                  |
| $\Delta 7\text{NR}$     | Deletion of seven azo- and nitro-reductase enzymes (AzoR, MdaB, NemA, NfsA, NfsB, YcaK, YieF) from <i>E. coli</i> K-12 W3110 (2)                                 | >32                                                  |
| $\Delta 7\text{NRtolC}$ | $\Delta 7\text{NR}$ with additional deletion of the TolC outer membrane factor (2)                                                                               | 0.016                                                |

(1) Baba T, Ara T, Hasegawa M, Takai Y, Okumura Y, Baba M, Datsenko KA, Tomita M, Wanner BL, Mori H. 2006. Construction of Escherichia coli K-12 in-frame, single-gene knockout mutants: the Keio collection. *Mol Syst Biol* 2:2006.0008.

(2) Copp JN, Williams EM, Rich MH, Patterson AV, Smaill JB, Ackerley DF. 2014. Toward a high-throughput screening platform for directed evolution of enzymes that activate genotoxic prodrugs. *Protein Eng Des Sel* 27:399–403.
