# Supplementary material for: Mechanistic Understanding Enables the Rational Design of Salicylanilide Combination Therapies for Gram-Negative Infections
Source: PubMed Central journal article supplement (PMC7492738; doi:10.1128/mbio.02068-20), 2020-09-15
Supplement: mBio.02068-20-st002.pdf [file mBio.02068-20-st002.pdf]

**Table S2 | The assessment of antibiotic compounds administered alone or in combination with oxyclozanide**

| Antibiotic      | Compound class       | Target                 | BW25113 MIC <sup>a</sup> (µg/mL) | BW25113 ZIP score <sup>b</sup> | BW25113 FICI <sup>c</sup> | $\Delta$ tolC MIC <sup>a</sup> (µg/mL) | $\Delta$ tolC ZIP score <sup>b</sup> | $\Delta$ tolC FICI <sup>c</sup> |
|-----------------|----------------------|------------------------|----------------------------------|--------------------------------|---------------------------|----------------------------------------|--------------------------------------|---------------------------------|
| Chloramphenicol | Amphenicol           | Protein synthesis      | 32                               | 5.6                            | 0.38                      | 2                                      | 1.2                                  | 0.75                            |
| Tetracycline    | Tetracycline         | Protein synthesis      | 2                                | 9.0                            | 0.25                      | 0.5                                    | -0.8                                 | 0.75                            |
| Gentamicin      | Aminoglycoside       | Protein synthesis      | 0.25                             | -6.3                           | 9                         | 0.5                                    | -8.5                                 | 8.5                             |
| Fosfomycin      | Phosphonic acid      | Cell wall biosynthesis | 32                               | -0.6                           | 1                         | 16                                     | -3.6                                 | 2                               |
| Cefotaxime      | Cephalosporin        | Cell wall biosynthesis | 0.064                            | 10.8                           | 0.38                      | 0.016                                  | -4.8                                 | 3                               |
| Meropenem       | Carbapenem           | Cell wall biosynthesis | 0.128                            | 5.7                            | 0.38                      | 0.128                                  | -5.0                                 | 2.5                             |
| Rifampicin      | Ansamycin            | RNA synthesis          | 32                               | 1.7                            | 1                         | 4                                      | -2.2                                 | 2                               |
| Metronidazole   | Nitroimidazole       | DNA                    | 1024                             | 0.4                            | 1                         | 1024                                   | 5.0                                  | 1.25                            |
| Nitrofurantoin  | Nitrofuran           | DNA/multiple           | 8                                | 8.5                            | 0.75                      | 2                                      | 3.8                                  | 0.5                             |
| Vancomycin      | Glycopeptide         | Cell wall biosynthesis | 256                              | -0.3                           | 2                         | 256                                    | -4.1                                 | 1                               |
| Trimethoprim    | Pyrimidine inhibitor | Folate synthesis       | 4                                | 2.9                            | 0.38                      | 0.25                                   | 2.2                                  | 0.75                            |
| Ciprofloxacin   | Quinolone            | DNA synthesis          | 0.032                            | 6.1                            | 0.75                      | 0.032                                  | -3.0                                 | 2                               |

<sup>a</sup> MIC analyses were performed in M9 minimal media

<sup>b</sup> ZIP scores were calculated from checkerboard assays with oxyclozanide in M9 minimal media

<sup>c</sup> The fractional inhibitory concentration index (FICI) was calculated from checkerboard assays with oxyclozanide in M9 minimal media
