# Supplementary material for: Mechanistic Understanding Enables the Rational Design of Salicylanilide Combination Therapies for Gram-Negative Infections
Source: PubMed Central journal article supplement (PMC7492738; doi:10.1128/mbio.02068-20), 2020-09-15
Supplement: mBio.02068-20-st003.pdf [file mBio.02068-20-st003.pdf]

**Table S3 | Clinical strains utilized in this study**

| Strain                                | Colistin MIC (µg/mL) | Relevant characteristics                                                 | Reference or source |
|---------------------------------------|----------------------|--------------------------------------------------------------------------|---------------------|
| <b><i>Pseudomonas aeruginosa</i></b>  |                      |                                                                          |                     |
| <i>P. aeruginosa</i> LESB58           | 4                    | Liverpool Epidemic Strain isolate; colistin resistant                    | (1)                 |
| <i>P. aeruginosa</i> NZRM4034         | 1                    | Ceftazidime/piperacillin resistant isolate                               | ESR resources       |
| <b><i>Acinetobacter baumannii</i></b> |                      |                                                                          |                     |
| <i>A. baumannii</i> Ab5075            | 0.25                 | Virulent wound isolate                                                   | (2)                 |
| <i>A. baumannii</i> NZRM3289          | 1                    | Urine isolate (ATCC19606)                                                | ESR resources       |
| <i>A. baumannii</i> C4                | 37.5                 | Colistin-resistant isolate; phosphatidylethanolamine addition to lipid A | (3)                 |
| <b><i>Klebsiella pneumoniae</i></b>   |                      |                                                                          |                     |
| <i>K. pneumoniae</i> KPLN49           | 0.5                  | Vancouver General Hospital Isolate                                       | (4)                 |
| <i>K. pneumoniae</i> NZRM4387         | 1                    | Extended spectrum β-lactamase urine isolate                              | ESR resources       |
| <b><i>Enterobacter cloacae</i></b>    |                      |                                                                          |                     |
| <i>E. cloacae</i> 218R1               | 0.25                 | Class C β-lactamase overproducing strain                                 | (5)                 |
| <b><i>Escherichia coli</i></b>        |                      |                                                                          |                     |
| <i>E. coli</i> E38 (serotype O78:H)   | 0.25                 | Human peritoneum isolate                                                 | BEI Resources       |
| <i>E. coli</i> NZRM4403               | 0.5                  | β-lactamase overproducing human blood isolate                            | ESR resources       |
| <i>E. coli</i> NCTC13846              | 3                    | Colistin resistant isolate; plasmid-borne mcr-1                          | (6)                 |

## References

- (1) Cheng K, Smyth RL, Govan JR, Doherty C, Winstanley C, *et al.* 1996. Spread of β-lactam-resistant *Pseudomonas aeruginosa* in a cystic fibrosis clinic. *Lancet* 348:639-642
- (2) Jacobs AC, Thompson MG, Black CC, Kessler JL, Clark LP, *et al.* 2014. AB5075, a highly virulent isolate of *Acinetobacter baumannii*, as a model strain for the evaluation of pathogenesis and antimicrobial treatments. *mBio* 5:e01076-14
- (3) Arroyo LA, Herrera CM, Fernandez L, Hankins JV, Trent MS *et al.* 2011. The pmrCAB operon mediates polymyxin resistance in *Acinetobacter baumannii* ATCC17978 and clinical isolates through phosphoethanolamine modification of lipid A. *Antimicrob Agents Chemother* 55:3732-3752
- (4) Behroozian S, Svensson SL, Davies J. 2016. Kisameet clay exhibits potent antibacterial activity against the ESKAPE pathogens. *mBio* 7:e01842-15
- (5) Marchou B, Bellido F, Charnas R, Lucain C, Pechere JC. 1987. Contribution of β-lactamase hydrolysis and outer membrane permeability to ceftriaxone resistance in *Enterobacter cloacae*. *Antimicrob Agents Chemother* 32:1589095
- (6) Akhoundsadegh N, Belanger CR, Hancock REW. 2019. Outer Membrane Interaction Kinetics of New Polymyxin B Analogs in Gram-Negative Bacilli. *Antimicrob Agents Chemother* 63:277.
